# Supplementary material
Source: publisher site journal article supplement (https://www.spandidos-publications.com/5643/downloadSupplementary)

Figure S1. DNA electrophoresis strip image. The wild-type was 1,591 bp and the adropin knockout homozygote was 964 bp. The lane numbers correspond to the ear tag numbers assigned to each mouse.

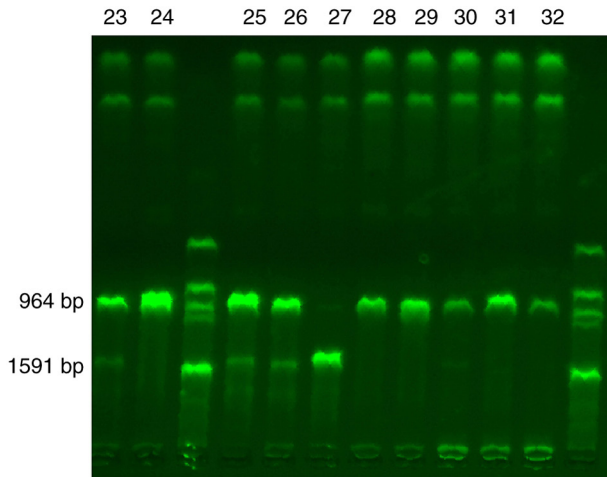

Figure S2. Information of the administration route and schedule of the animal experiment. L-Arg, L-arginine; Adro, adropin.

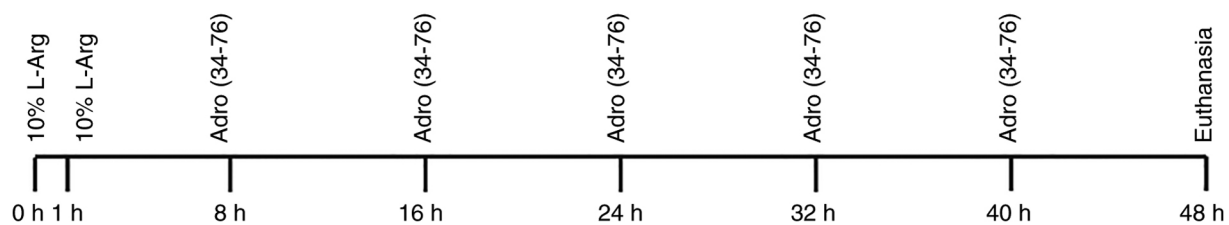

Supplement: Supplementary file 1 [file downloadSupplementary]
